# Supplementary material
Source: Springer Nature journal article supplement (https://www.springermedizin.de/resource/supplementary/12943_2010_779_MOESM10_ESM.pdf/9554798)

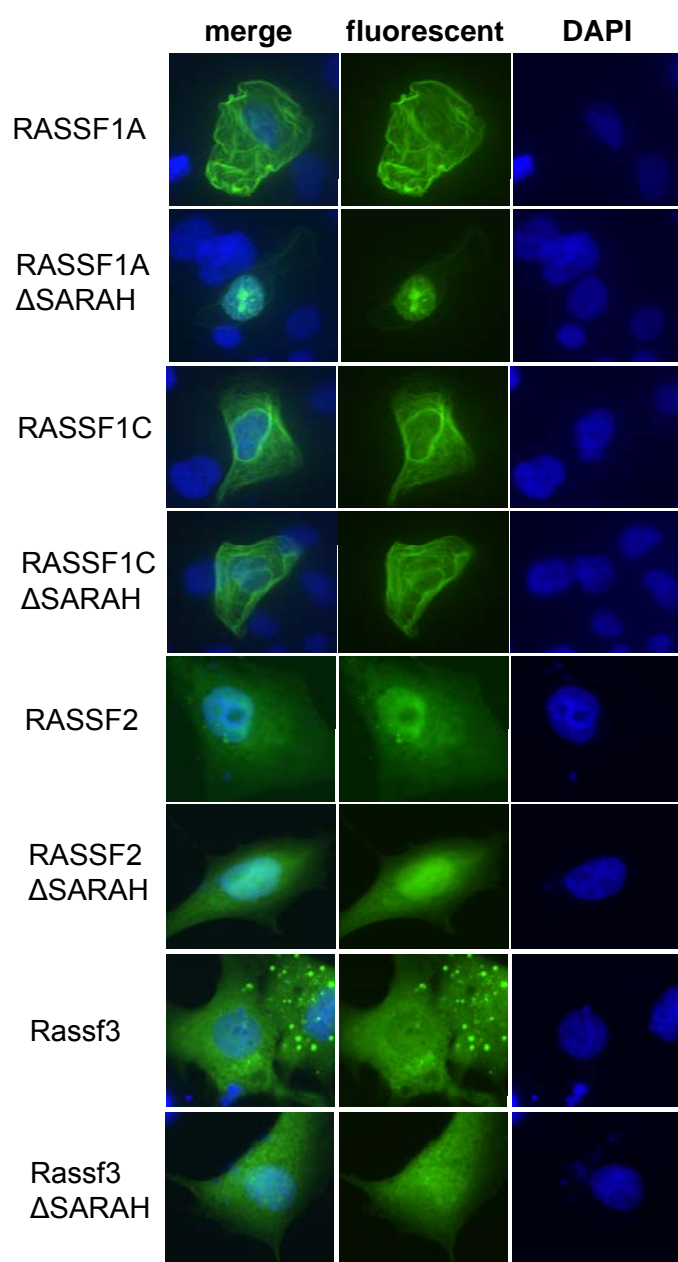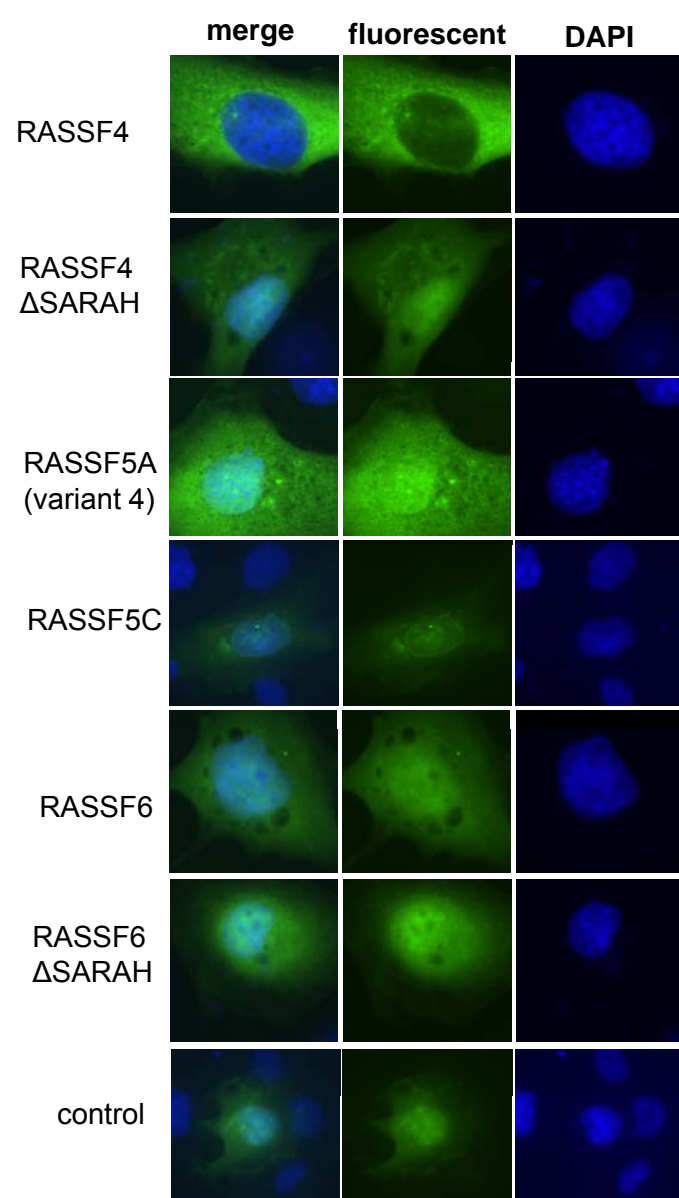

Supplement: MOESM10 [file 9554798]
